# Supplementary material
Source: PubMed Central journal article supplement (PMC4113197)
Supplement: NIHMS590767-supplement-Suppl_Tables.pdf [file NIHMS590767-supplement-Suppl_Tables.pdf]

**Supplemental Table 1.** AD GWAS information: cases and controls, ADGC cohort

|                                     | Cases (n = 1443) | Controls (n = 99) |
|-------------------------------------|------------------|-------------------|
| Gender, n (%)                       |                  |                   |
| Male                                | 680 (47.1)       | 57 (57.6)         |
| Female                              | 763 (52.9)       | 42 (42.4)         |
| Age, mean (SD)                      | 80.9 (6.8)       | 85.2 (7.4)        |
| Braak stage, n (%)                  |                  |                   |
| No degeneration                     | 0 (0)            | 14 (13.7)         |
| Stage I                             | 0 (0)            | 29 (29.4)         |
| Stage II                            | 0 (0)            | 30 (30.4)         |
| Stage III                           | 0 (0)            | 26 (26.5)         |
| Stage IV                            | 0 (0)            | 0 (0)             |
| Stage V                             | 639 (44.2)       | 0 (0)             |
| Stage VI                            | 804 (55.8)       | 0 (0)             |
| CERAD NP plaque density, n (%)      |                  |                   |
| High NP plaques                     | 1385 (96.0)      | 0(0)              |
| Moderate NP plaques                 | 57(4.0)          | 0(0)              |
| Low/No NP plaques/Not done          | 0(0)             | 99 (100)          |
| Documented clinical dementia, n (%) |                  |                   |
| Yes                                 | 1368 (94.8)      | 19 (19.2)         |
| No or missing                       | 75 (5.2)         | 80 (80.8)         |

**Supplemental Table 1 Legend.** Information about cases and controls from the AD GWAS. All these cases were included from the ADGC cohort. For exclusion and inclusion criteria, see Supplemental methods.

**Supplemental Table 2** AD pathology GWAS data: Top 10 AD GWAS hits using AD pathology criteria applied to ADGC dataset

| <b>SNP</b> | <b>Chr</b> | <b>Position<br/>(NCBI 37)</b> | <b>Region</b> | <b>P-value</b> |
|------------|------------|-------------------------------|---------------|----------------|
| rs2075650  | 19         | 45395619                      | TOMM40        | 4.23E-13       |
| rs11556505 | 19         | 45396144                      | TOMM40        | 1.53E-12       |
| rs34404554 | 19         | 45395909                      | TOMM40        | 1.82E-12       |
| rs17169634 | 7          | 34093997                      | BMPER         | 1.15E-07       |
| rs75353220 | 7          | 34094036                      | BMPER         | 1.82E-07       |
| rs74651988 | 7          | 34065142                      | BMPER         | 6.31E-07       |
| rs75847378 | 2          | 40181517                      | SLC8A1-AS1    | 6.70E-07       |
| rs75733828 | 7          | 34057913                      | BMPER         | 7.14E-07       |
| rs79312206 | 7          | 34068665                      | BMPER         | 7.14E-07       |
| rs74495807 | 7          | 34088535                      | BMPER         | 7.94E-07       |

**Supplemental Table 2 Legend.** Results of GWAS using AD pathology as case-control criteria for GWAS. Note that TOMM40 is probably a proxy allele for APOE genotype.

**Supplemental Table 3** HS-Aging GWAS information: cases and controls, ADGC cohort

|                               | Cases (n = 186) | Controls (n = 1450) |
|-------------------------------|-----------------|---------------------|
| Gender, n (%)                 |                 |                     |
| Male                          | 84 (45.2)       | 743 (51.2)          |
| Female                        | 102 (54.8)      | 707 (48.8)          |
| Age, mean (SD)                | 84.1 (8.2)      | 81.5 (8.7)          |
| NPBRAAK, n (%)                |                 |                     |
| Stage I                       | 4 (2.2)         | 37 (2.6)            |
| Stage II                      | 4 (2.2)         | 56 (3.9)            |
| Stage III                     | 6 (3.2)         | 120 (8.3)           |
| Stage IV                      | 26 (14)         | 196 (13.5)          |
| Stage V                       | 65 (34.9)       | 395 (27.3)          |
| Stage VI                      | 80 (43)         | 627 (43.3)          |
| No degeneration               | 1 (0.5)         | 18 (1.2)            |
| NPCERAD, n (%)                |                 |                     |
| Definite/probable/possible AD | 165 (95.9)      | 1159 (92.7)         |
| Disease criteria not met      | 7 (4.1)         | 91 (7.3)            |
| Years of education, n (%)     |                 |                     |
| 12 years or less              | 62 (33.9)       | 451 (32)            |
| More than 12 years            | 121 (66.1)      | 960 (68)            |
| CLINICAL DEMENTIA, n (%)      |                 |                     |
| Yes                           | 153 (90)        | 1032 (82.6)         |
| No                            | 17 (10)         | 218 (17.4)          |

**Supplemental Table 3 Legend.** Information about cases and controls from the HS-Aging GWAS. All these cases were included from the ADGC cohort and had replete neuropathologic information. For exclusion and inclusion criteria, see Supplemental methods.

**Supplemental Table 4. All SNPs with  $p < 10^{-5}$  in the Stage I cohorts GWAS**

| Locus area                              | Chr | SNP at Locus with lowest $p$ -value | position  | Minor Allele | Major Allele | MAF Cases | MAF Controls | $p$ -value (Additive MOI) |
|-----------------------------------------|-----|-------------------------------------|-----------|--------------|--------------|-----------|--------------|---------------------------|
| ABCC9                                   | 12  | rs7966849                           | 22004199  | G            | A            | 0.38      | 0.51         | 1.01E-07                  |
| ABCC9                                   | 12  | rs704182                            | 22002569  | T            | C            | 0.38      | 0.51         | 1.44E-07                  |
| ABCC9                                   | 12  | rs829079                            | 21999109  | G            | T            | 0.38      | 0.51         | 2.62E-07                  |
| ABCC9                                   | 12  | rs704177                            | 21993273  | A            | T            | 0.38      | 0.51         | 3.63E-07                  |
| ABCC9                                   | 12  | rs704180                            | 21994112  | G            | A            | 0.38      | 0.51         | 3.88E-07                  |
| ABCC9                                   | 12  | rs704178                            | 21993479  | C            | G            | 0.38      | 0.51         | 3.90E-07                  |
| ABCC9                                   | 12  | rs1283822                           | 22001884  | A            | C            | 0.39      | 0.51         | 4.57E-07                  |
| CTAGE5                                  | 14  | rs8018486                           | 39818617  | G            | A            | 0.11      | 0.21         | 1.15E-06                  |
| intergenic                              | 14  | rs4636812                           | 39828196  | T            | C            | 0.11      | 0.20         | 1.38E-06                  |
| intergenic                              | 3   | rs114816986                         | 155035752 | A            | G            | 0.30      | 0.08         | 1.97E-06                  |
| CTAGE5                                  | 14  | rs28718785                          | 39820399  | T            | C            | 0.11      | 0.20         | 2.07E-06                  |
| CTAGE5                                  | 14  | rs4393482                           | 39818433  | G            | T            | 0.17      | 0.28         | 2.09E-06                  |
| CTAGE5                                  | 14  | rs2274397                           | 39815476  | T            | A            | 0.11      | 0.20         | 2.13E-06                  |
| intergenic                              | 14  | rs10483537                          | 39915084  | C            | G            | 0.11      | 0.20         | 2.65E-06                  |
| intergenic                              | 14  | rs11629406                          | 39912005  | G            | T            | 0.11      | 0.20         | 2.74E-06                  |
| FBXO33                                  | 14  | rs10145518                          | 39896328  | A            | C            | 0.11      | 0.20         | 2.96E-06                  |
| CTAGE5(dist=9215);FBXO33(dist=35965)    | 14  | rs7148572                           | 39829612  | A            | G            | 0.11      | 0.20         | 2.98E-06                  |
| FBXO33(dist=8989);NONE(dist=NONE)       | 14  | rs4902657                           | 39910693  | A            | G            | 0.11      | 0.20         | 3.04E-06                  |
| FBXO33(dist=14363);NONE(dist=NONE)      | 14  | rs4902668                           | 39916067  | A            | G            | 0.11      | 0.20         | 3.16E-06                  |
| CTAGE5(dist=10909);FBXO33(dist=34271)   | 14  | rs62000717                          | 39831306  | T            | C            | 0.11      | 0.20         | 3.31E-06                  |
| CTAGE5(dist=7708);FBXO33(dist=37472)    | 14  | rs4328353                           | 39828105  | T            | C            | 0.11      | 0.20         | 3.35E-06                  |
| FBXO33(dist=15032);NONE(dist=NONE)      | 14  | rs10083310                          | 39916736  | C            | A            | 0.11      | 0.20         | 3.39E-06                  |
| FBXO33(dist=17320);NONE(dist=NONE)      | 14  | rs10139612                          | 39919024  | T            | C            | 0.11      | 0.20         | 3.39E-06                  |
| CTAGE5                                  | 14  | rs4902542                           | 39821101  | T            | C            | 0.12      | 0.21         | 3.40E-06                  |
| MIR2054(dist=1232924);INTU(dist=892701) | 4   | rs62324179                          | 127661386 | T            | C            | 0.26      | 0.18         | 3.65E-06                  |
| FBXO33                                  | 14  | rs10136852                          | 39888440  | G            | C            | 0.11      | 0.20         | 3.70E-06                  |
| CTAGE5(dist=29865);FBXO33(dist=15315)   | 14  | rs10149896                          | 39850262  | T            | C            | 0.11      | 0.20         | 3.76E-06                  |
| FBXO33(dist=73038);NONE(dist=NONE)      | 14  | rs10146966                          | 39974742  | T            | G            | 0.11      | 0.20         | 3.76E-06                  |
| FBXO33                                  | 14  | rs4902601                           | 39881324  | C            | T            | 0.11      | 0.20         | 3.82E-06                  |
| FBXO33(dist=80724);NONE(dist=NONE)      | 14  | rs2038279                           | 39982428  | A            | T            | 0.18      | 0.28         | 3.93E-06                  |

|                                          |    |             |          |   |   |      |      |          |
|------------------------------------------|----|-------------|----------|---|---|------|------|----------|
| FBXO33(dist=24469);NONE(dist=NONE)       | 14 | rs28689476  | 39926173 | G | A | 0.11 | 0.20 | 4.00E-06 |
| FBXO33(dist=60626);NONE(dist=NONE)       | 14 | rs11157068  | 39962330 | C | T | 0.11 | 0.20 | 4.21E-06 |
| FBXO33(dist=64977);NONE(dist=NONE)       | 14 | rs140701311 | 39966681 | G | A | 0.11 | 0.20 | 4.21E-06 |
| FBXO33(dist=27464);NONE(dist=NONE)       | 14 | rs7145382   | 39929168 | G | A | 0.11 | 0.20 | 4.31E-06 |
| FBXO33(dist=36000);NONE(dist=NONE)       | 14 | rs28839914  | 39937704 | T | C | 0.11 | 0.20 | 4.31E-06 |
| ABCC9                                    | 12 | rs1283817   | 21984971 | A | C | 0.56 | 0.45 | 4.34E-06 |
| FBXO33(dist=78593);NONE(dist=NONE)       | 14 | rs4288915   | 39980297 | G | A | 0.18 | 0.28 | 4.34E-06 |
| ABCC9                                    | 12 | rs1283816   | 21984712 | C | T | 0.56 | 0.45 | 4.34E-06 |
| CTAGE5                                   | 14 | rs61398943  | 39811680 | A | T | 0.11 | 0.20 | 4.37E-06 |
| ABCC9                                    | 12 | rs1299731   | 21989355 | C | A | 0.56 | 0.45 | 4.74E-06 |
| ABCC9                                    | 12 | rs829068    | 21988670 | C | G | 0.56 | 0.45 | 4.94E-06 |
| PCDH17(dist=1542404);DIAPH3(dist=394252) | 13 | rs80155385  | 59845469 | C | G | 0.22 | 0.05 | 4.95E-06 |
| PCDH17(dist=1543575);DIAPH3(dist=393081) | 13 | rs4886143   | 59846640 | T | G | 0.22 | 0.05 | 4.95E-06 |
| CTAGE5                                   | 14 | rs28776502  | 39799698 | G | C | 0.12 | 0.21 | 4.99E-06 |
| CTAGE5                                   | 14 | rs117255274 | 39800454 | A | G | 0.12 | 0.21 | 4.99E-06 |
| CTAGE5                                   | 14 | rs7149197   | 39801320 | C | A | 0.12 | 0.21 | 4.99E-06 |
| CTAGE5                                   | 14 | rs7150685   | 39801323 | C | T | 0.12 | 0.21 | 4.99E-06 |
| CTAGE5                                   | 14 | rs62000689  | 39805546 | T | C | 0.12 | 0.21 | 4.99E-06 |
| CTAGE5                                   | 14 | rs56126634  | 39794623 | A | T | 0.12 | 0.21 | 5.14E-06 |
| CTAGE5                                   | 14 | rs4899200   | 39737912 | T | C | 0.18 | 0.28 | 5.22E-06 |
| CTAGE5                                   | 14 | rs6571920   | 39793555 | A | G | 0.12 | 0.21 | 5.72E-06 |
| PCDH17(dist=1564389);DIAPH3(dist=372267) | 13 | rs7992329   | 59867454 | T | C | 0.22 | 0.05 | 5.72E-06 |
| ABCC9                                    | 12 | rs1967534   | 21987948 | C | A | 0.56 | 0.45 | 5.79E-06 |
| ABCC9                                    | 12 | rs829069    | 21988801 | C | T | 0.56 | 0.45 | 5.79E-06 |
| CTAGE5                                   | 14 | rs10145517  | 39808312 | G | A | 0.17 | 0.27 | 5.97E-06 |
| ABCC9                                    | 12 | rs829080    | 21999864 | T | C | 0.31 | 0.43 | 6.10E-06 |
| FBXO33(dist=82126);NONE(dist=NONE)       | 14 | rs1950339   | 39983830 | G | T | 0.18 | 0.28 | 6.30E-06 |
| FBXO33(dist=114273);NONE(dist=NONE)      | 14 | rs12437323  | 40015977 | G | A | 0.17 | 0.27 | 6.47E-06 |
| NONE(dist=NONE);CNTN5(dist=374949)       | 11 | rs3018573   | 98516757 | G | A | 0.52 | 0.41 | 6.81E-06 |
| CTAGE5                                   | 14 | rs8019758   | 39790451 | G | C | 0.12 | 0.21 | 6.84E-06 |
| ABCC9                                    | 12 | rs704176    | 21992125 | C | G | 0.56 | 0.45 | 7.45E-06 |
| CTAGE5(dist=40541);FBXO33(dist=4639)     | 14 | rs10142724  | 39860938 | T | A | 0.12 | 0.21 | 7.51E-06 |
| CTAGE5                                   | 14 | rs8022515   | 39794360 | A | G | 0.12 | 0.20 | 7.83E-06 |
| FBXO33(dist=96755);NONE(dist=NONE)       | 14 | rs11624961  | 39998459 | C | T | 0.18 | 0.28 | 8.04E-06 |

|                                          |    |            |           |   |   |      |      |          |
|------------------------------------------|----|------------|-----------|---|---|------|------|----------|
| FRMD4A                                   | 10 | rs72769570 | 13810428  | A | G | 0.19 | 0.05 | 8.09E-06 |
| CTAGE5(dist=2670);FBXO33(dist=42510)     | 14 | rs8016293  | 39823067  | C | G | 0.11 | 0.20 | 8.29E-06 |
| NONE(dist=NONE);CNTN5(dist=419207)       | 11 | rs4393281  | 98472499  | T | C | 0.51 | 0.40 | 8.31E-06 |
| FBXO33(dist=95638);NONE(dist=NONE)       | 14 | rs7153750  | 39997342  | A | G | 0.18 | 0.28 | 8.85E-06 |
| FBXO33(dist=80083);NONE(dist=NONE)       | 14 | rs11623490 | 39981787  | A | G | 0.17 | 0.27 | 8.88E-06 |
| CTAGE5                                   | 14 | rs62000665 | 39766075  | T | C | 0.12 | 0.21 | 9.07E-06 |
| WVOX                                     | 16 | rs55751884 | 78231495  | C | T | 0.26 | 0.12 | 9.19E-06 |
| FBXO33(dist=88661);NONE(dist=NONE)       | 14 | rs7154346  | 39990365  | G | T | 0.18 | 0.28 | 9.35E-06 |
| CSNK1G3(dist=227012);ZNF608(dist=792860) | 5  | rs12514988 | 123179750 | T | C | 0.16 | 0.04 | 9.48E-06 |
| CSNK1G3(dist=227314);ZNF608(dist=792558) | 5  | rs73800014 | 123180052 | G | C | 0.16 | 0.04 | 9.48E-06 |
| CSNK1G3(dist=227506);ZNF608(dist=792366) | 5  | rs76479689 | 123180244 | G | A | 0.16 | 0.04 | 9.48E-06 |
| CSNK1G3(dist=227844);ZNF608(dist=792028) | 5  | rs12515740 | 123180582 | T | G | 0.16 | 0.04 | 9.48E-06 |
| CSNK1G3(dist=228505);ZNF608(dist=791367) | 5  | rs58563757 | 123181243 | T | C | 0.16 | 0.04 | 9.48E-06 |
| CSNK1G3(dist=228867);ZNF608(dist=791005) | 5  | rs60806829 | 123181605 | G | C | 0.16 | 0.04 | 9.48E-06 |
| CSNK1G3(dist=229023);ZNF608(dist=790849) | 5  | rs12516490 | 123181761 | A | G | 0.16 | 0.04 | 9.48E-06 |
| CSNK1G3(dist=229484);ZNF608(dist=790388) | 5  | rs77869131 | 123182222 | A | G | 0.16 | 0.04 | 9.48E-06 |
| CSNK1G3(dist=229575);ZNF608(dist=790297) | 5  | rs78790332 | 123182313 | T | G | 0.16 | 0.04 | 9.48E-06 |
| CSNK1G3(dist=230388);ZNF608(dist=789484) | 5  | rs75623302 | 123183126 | G | C | 0.16 | 0.04 | 9.48E-06 |
| CSNK1G3(dist=235111);ZNF608(dist=784761) | 5  | rs74440410 | 123187849 | A | G | 0.16 | 0.04 | 9.48E-06 |
| CSNK1G3(dist=238988);ZNF608(dist=780884) | 5  | rs72663342 | 123191726 | C | G | 0.16 | 0.04 | 9.74E-06 |
| CTAGE5                                   | 14 | rs61998552 | 39739482  | G | C | 0.12 | 0.21 | 9.89E-06 |
| FBXO33(dist=104271);NONE(dist=NONE)      | 14 | rs11623451 | 40005975  | T | C | 0.18 | 0.27 | 1.00E-05 |
